# Supplementary material for: Indirect determination of sulfide ions in water samples at trace level by anodic stripping voltammetry using mercury film electrode
Source: Royal Society of Chemistry journal article supplement (doi:10.1039/b9ay00183b), 2009-12-07
Supplement: b9ay00183b.pdf [file b9ay00183b.pdf]

## Supporting Information

### Indirect determination of sulfide ions in water samples at trace level by anodic stripping voltammetry using mercury film electrode

5 Deqian Huang,<sup>a</sup> Bolei Xu,<sup>a</sup> Jie Tang,<sup>a</sup> Jian Luo,<sup>a</sup> Luhong Chen,<sup>a</sup> Lili Yang,<sup>b</sup> Zhengbiao Yang<sup>b</sup>  
and Shuping Bi<sup>\*a</sup>

<sup>a</sup>School of Chemistry and Chemical Engineering, State Key Laboratory of Coordination Chemistry of China &

10 MOE Key Laboratory for Life Science, Nanjing University, Nanjing 210093, China

<sup>b</sup>Nanjing Environmental Monitoring Centre, Nanjing 210013, China

#### 15 1. The basic water quality parameters in various water samples

Table S1 presents the concentrations of some heavy metals and other elements in beverage and different spiked water matrices. The concentrations of heavy metals are very low and do not interfere the determination of S<sup>2-</sup>.

20

Table S1 The basic water quality parameters measured by ICP-AES (mg L<sup>-1</sup>)

| Elements | Maidong beverage | Nongfu spring water | Wastewater | LOD   |
|----------|------------------|---------------------|------------|-------|
| K        | 4.09             | 1.13                | 4.66       | 0.06  |
| Ca       | 20.4             | 14.0                | 433        | 0.002 |
| Na       | 4.35             | 5.45                | 1430       | 0.005 |
| Mg       | 0.60             | 1.91                | 29.8       | 0.02  |
| Al       | 0.49             | ND                  | ND         | 0.01  |
| Si       | 0.39             | 2.04                | 5.38       | 0.002 |
| Cu       | ND               | ND                  | ND         | 0.002 |
| Zn       | ND               | ND                  | ND         | 0.002 |
| Pb       | ND               | ND                  | ND         | 0.02  |
| Cd       | ND               | ND                  | ND         | 0.002 |
| Ni       | ND               | ND                  | ND         | 0.003 |
| Cr       | ND               | ND                  | ND         | 0.002 |
| As       | ND               | ND                  | ND         | 0.021 |
| P        | ND               | ND                  | ND         | 0.02  |
| Co       | ND               | ND                  | ND         | 0.001 |
| Ba       | ND               | ND                  | ND         | 0.001 |
| Fe       | ND               | ND                  | ND         | 0.002 |
| Ti       | ND               | ND                  | ND         | 0.003 |
| Mn       | ND               | ND                  | ND         | 0.005 |
| V        | ND               | ND                  | ND         | 0.001 |
| Mo       | ND               | ND                  | ND         | 0.003 |

\*LOD means the ICP-AES detection limit for different elements
